# Supplementary material for: Low triiodothyronine syndrome is associated with hemorrhagic transformation in patients with acute ischaemic stroke
Source: publisher site journal article supplement (doi:10.18632/aging.102195), 2019-08-27
Supplement: Supplementary file [file aging-v11i16-102195-supplementary-material-SD1.pdf]

## SUPPLEMENTARY TABLE

**Supplementary Table 1. Comparison of the baseline characteristics in AIS patients with low T3 syndrome stratified by HT.**

| Variables                                        | Non-HT (n = 68) | HT (n = 139)   | P-value* |
|--------------------------------------------------|-----------------|----------------|----------|
| <b>Demographic parameters</b>                    |                 |                |          |
| Age (years)                                      | 72.1 ± 9.7      | 70.4 ± 10.5    | 0.264    |
| Male, n (%)                                      | 49 (72.1%)      | 97 (69.8%)     | 0.736    |
| BMI (kg/m <sup>2</sup> )                         | 22.8 ± 2.8      | 23.3 ± 3.4     | 0.458    |
| Marital status                                   |                 |                | 0.799    |
| Married, n (%)                                   | 64 (94.1%)      | 132 (95.0%)    |          |
| <b>Vascular risk factors</b>                     |                 |                |          |
| History of atrial fibrillation, n (%)            | 9 (13.2%)       | 54 (38.8%)     | <0.001   |
| History of hypertension, n (%)                   | 46 (67.6%)      | 96 (69.1%)     | 0.836    |
| History of diabetes, n (%)                       | 20 (29.4%)      | 36 (25.9%)     | 0.593    |
| History of dyslipidemia, n (%)                   | 5 (7.4%)        | 12 (8.6%)      | 0.753    |
| Current smoking, n (%)                           | 37 (54.4%)      | 64 (46.4%)     | 0.278    |
| Current drinking, n (%)                          | 35 (55.6%)      | 59 (42.8%)     | 0.092    |
| <b>Biochemistry and vital signs on admission</b> |                 |                |          |
| Baseline SBP (mmHg)                              | 156.3 ± 23.2    | 150.3 ± 23.4   | 0.087    |
| Baseline DBP (mmHg)                              | 79.3 ± 13.3     | 83.6 ± 14.6    | 0.047    |
| Leukocyte counts (×10 <sup>9</sup> /L)           | 6.5 ± 1.8       | 9.0 ± 3.5      | <0.001   |
| Platelets (×10 <sup>9</sup> /L)                  | 202.0 ± 48.3    | 201.1 ± 67.6   | 0.917    |
| Hgb (g/L)                                        | 132.0 ± 15.5    | 137.6 ± 16.8   | 0.023    |
| Fibrinogen (g/L)                                 | 3.4 ± 0.9       | 4.1 ± 1.4      | <0.001   |
| Glucose levels (mmol/L)                          | 5.8 ± 1.7       | 6.6 ± 2.9      | 0.032    |
| Total cholesterol (mmol/L)                       | 2.5 ± 1.7       | 3.7 ± 1.8      | <0.001   |
| TSH (mIU/L)                                      | 1.4 ± 0.7       | 1.5 ± 0.9      | 0.405    |
| T4 (nmol/L)                                      | 100.2 ± 19.8    | 106.5 ± 19.7   | 0.032    |
| T3 (nmol/L)                                      | 1.1 ± 0.1       | 1.0 ± 0.2      | <0.001   |
| FT4 (pmol/L)                                     | 11.5 ± 2.1      | 12.1 ± 2.1     | 0.057    |
| FT3 (pmol/L)                                     | 4.0 ± 0.5       | 3.9 ± 0.6      | 0.078    |
| NIHSS on admission, median (IQR)                 | 5.0 (1.8-10.0)  | 7.0 (3.0-11.0) | 0.033    |
| <b>Stroke mechanisms</b>                         |                 |                |          |
| Atherosclerotic, n (%)                           | 55 (80.9%)      | 103 (74.1%)    | 0.236    |
| Cardioembolic, n (%)                             | 11 (16.2%)      | 35 (25.2%)     |          |
| Lacunar, n (%)                                   | 1 (1.5%)        | 0              |          |
| Other causes, n (%)                              | 1 (1.5%)        | 1 (0.7%)       |          |
| <b>Initial treatment in hospital</b>             |                 |                |          |
| Antiplatelets, n (%)                             | 59 (86.8%)      | 74 (53.2%)     | <0.001   |
| Anticoagulants, n (%)                            | 10 (14.7%)      | 39 (28.1%)     | 0.034    |
| Lipid-lowering agents, n (%)                     | 66 (97.1%)      | 121 (87.1%)    | 0.022    |

NOTE. BMI, body mass index; DBP, diastolic blood pressure; Hgb, hemoglobin; HT: hemorrhagic transformation; NIHSS, National Institutes of Health Stroke Scale; SBP, systolic blood pressure; T3, triiodothyronine; T4, total thyroxine; TSH: thyroid stimulating hormone. \*Continuous variables were compared between the groups by the Student's t-test or the Mann-Whitney test. The chi-square test was used for categorical variables.
